# Supplementary material
Source: Springer Nature journal article supplement (https://www.springermedizin.de/resource/supplementary/13054_2013_3056_MOESM6_ESM.pdf/9712594)

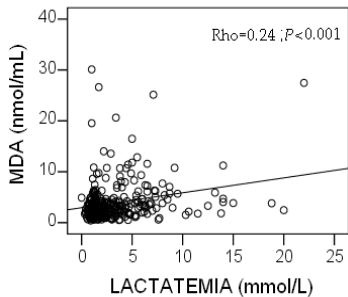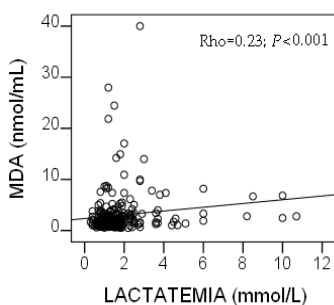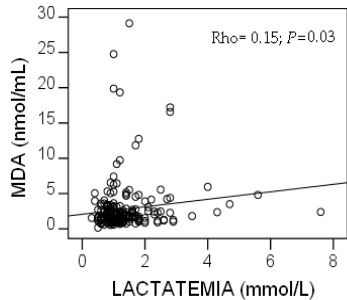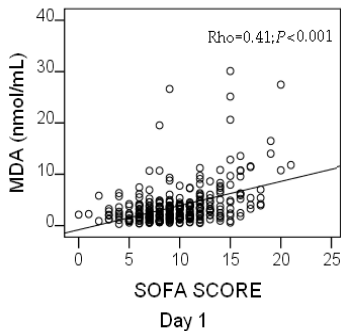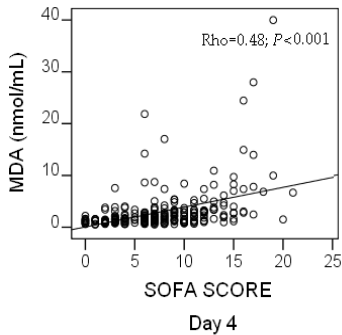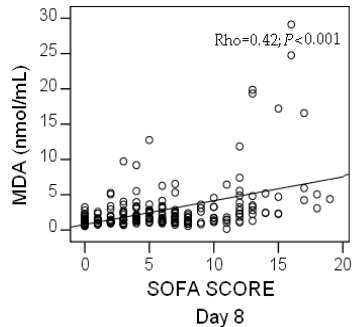

TIME

Supplement: MOESM6 [file 9712594]
